# Supplementary material for: Whole-Transcriptome RNA Sequencing Reveals the Global Molecular Responses and CeRNA Regulatory Network of mRNAs, lncRNAs, miRNAs and circRNAs in Response to Salt Stress in Sugar Beet (Beta vulgaris)
Source: MDPI journal article supplement (doi:10.3390/ijms22010289), 2020-12-30
Supplement: s1 [file s1]

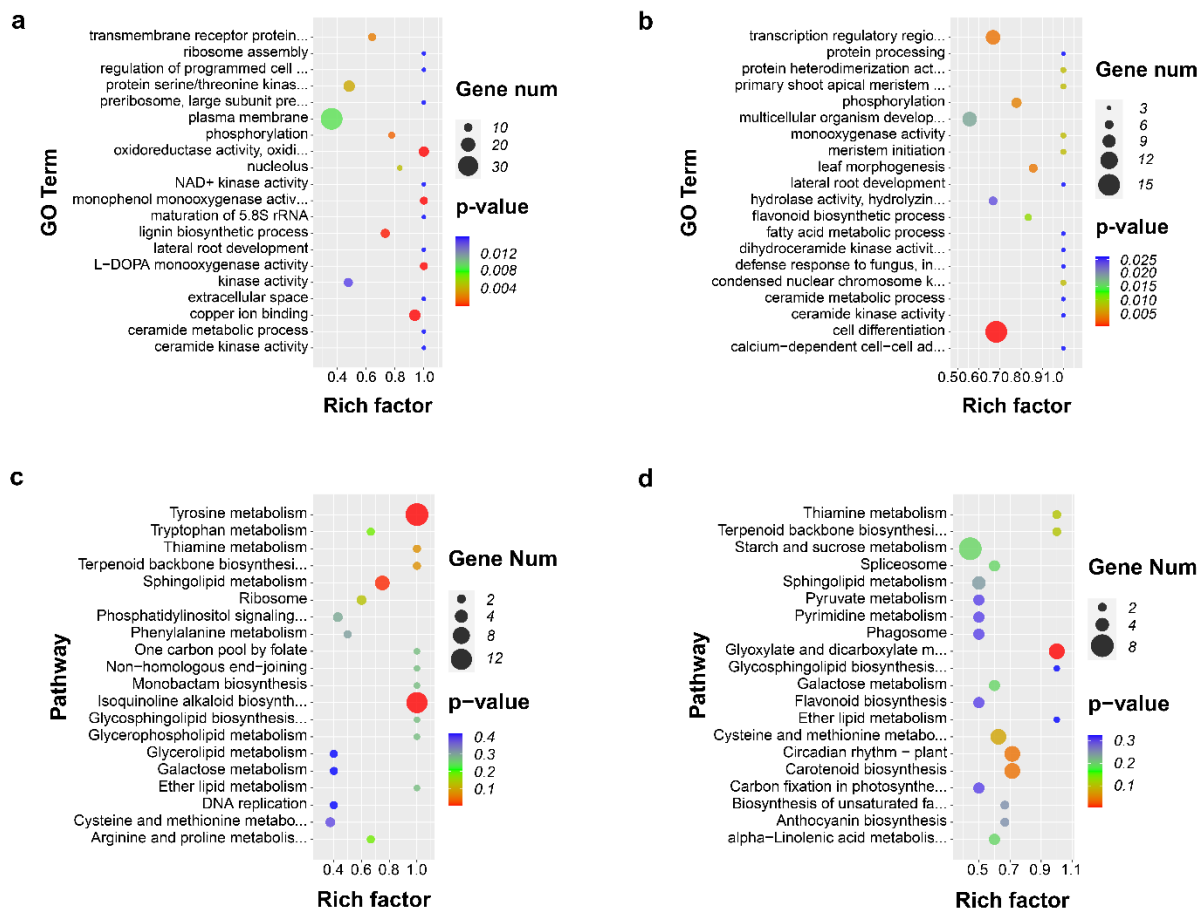

**Fig. S2.** GO and KEGG enrichment analysis of DEMiRNAs targets. (a) GO enrichment analysis of targets of DEMiRNAs in leaves; (b) GO enrichment analysis of targets of DEMiRNAs in roots; (c) KEGG enrichment analysis of targets of DEMiRNAs in leaves; (d) KEGG enrichment analysis of targets of DEMiRNAs in roots.

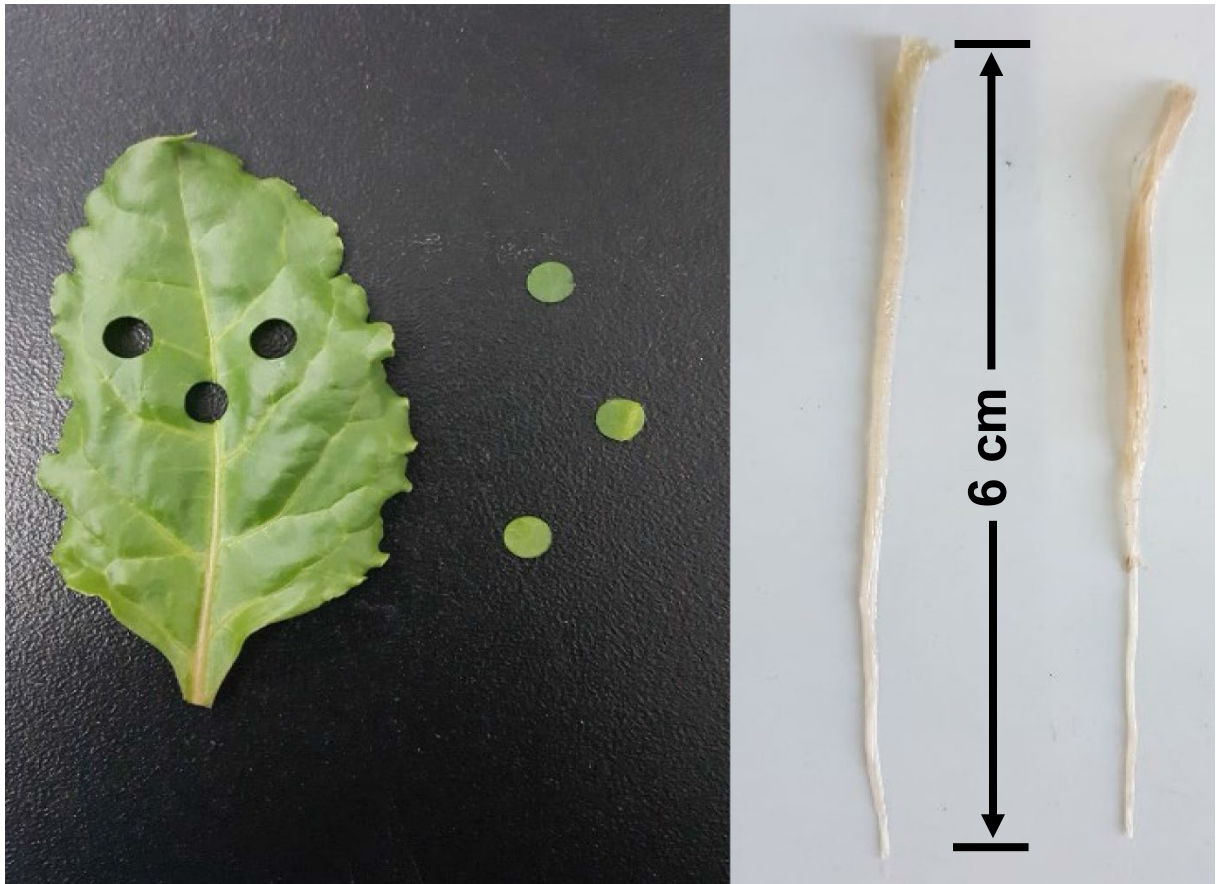

**Fig. S3.** Sampling location. Left: the third-pair of euphylla from six plants were taken and mixed for leaf sequencing. Right: a length of 6 cm from the root tip was collected from six plant samples and mixed for root sequencing.
